# Supplementary material for: Identification and Profiling Analysis of microRNAs in Guava Fruit (Psidium guajava L.) and Their Role during Ripening
Source: MDPI journal article supplement (doi:10.3390/genes14112029), 2023-10-31
Supplement: s1 [file s1]

## Supplementary data S1

**Table S1.** Mature miRNA sequences found in guava fruit

| miRNA                     | Sequence               | Length | Match Type     |
|---------------------------|------------------------|--------|----------------|
| MIR10219                  | GAGGTTGTTTGGCTTGAGC    | 19     | M 3' sub       |
| MIR156a                   | TTGACAGAAGATAGAGAGCACT | 22     | M 5' super     |
| MIR156a//MIR156b//MIR156c | TTGACAGAAGATAGAGAGCAC  | 21     | M 5'           |
| MIR159                    | TTTGGATTGAAGGGAGCTCTA  | 21     | M 3'           |
|                           | TTTTGGATTGAAGGGAGCTCT  | 21     | M 3' sub/super |
|                           | TTTTTGGATTGAAGGGAGCTC  | 21     | M 3' sub/super |
|                           | TTGGATTGAAGGGAGCTCTA   | 20     | M 3' sub       |
|                           | TTTGGATTGAAGGGAGCTCTAT | 22     | M 3' super     |
|                           | TTTTGGATTGAAGGGAGCTCTA | 22     | M 3' super     |
|                           | TGGATTGAAGGGAGCTCTA    | 19     | M 3' sub       |
|                           | AGCTGCTGGTCTATGGATCCC  | 21     | M 5'           |
|                           | AGCTGCTGGTCTATGGATC    | 19     | M 5' sub       |
|                           | CTTGCAATATGCCAGGAGCTTC | 21     | M 3'           |
|                           | TTTTGGATTGAAGGGAGCTC   | 20     | M 3' sub/super |
|                           | AGCTGCTGGTCTATGGATCC   | 20     | M 5' sub       |
|                           | TTTTTGGATTGAAGGGAGCTCT | 22     | M 3' sub/super |
|                           | TTGCATATGCCAGGAGCTTC   | 20     | M 3' sub       |
|                           | TGAGCTGCTGGTCTATGGATC  | 21     | M 5' sub/super |
| MIR159a                   | TTTGGATTGAAGGGAGCTCTAC | 22     | M 3' super     |
| MIR159b                   | TTTGGATTGAAGGGAGCTCT   | 20     | M 5' sub       |
|                           | TTTGGATTGAAGGGAGCTCTT  | 21     | M 3'           |
|                           | TTTGGATTGAAGGGAGCTC    | 19     | M 5' sub       |
|                           | TTTGGATTGAAGGGAGCT     | 18     | M 5' sub       |
|                           | TTTGGATTGAAGGGAGCTCTC  | 21     | M 3'           |
|                           | TTTGGATTGAAGGGAGCTCTG  | 21     | M 5'           |
|                           | TTGGATTGAAGGGAGCTCT    | 19     | M 5' sub       |
|                           | ATTGGATTGAAGGGAGCTCT   | 20     | M 3' sub       |
|                           | TTTGGATTGAAGGGAGCTCTTC | 22     | M 3' super     |
|                           | TTGGATTGAAGGGAGCTC     | 18     | M 5' sub       |
|                           | TTTGGATTGAAGGGAGCTCTCT | 22     | M 3' super     |
|                           | TGGATTGAAGGGAGCTCT     | 18     | M 5' sub       |
| MIR159c                   | TTTGGATTGAAGGGAGCTCC   | 20     | M 3' sub       |
| MIR160c                   | TGCCTGGCTCCCTGTATGCT   | 20     | M 5' sub       |
| MIR162                    | TCGATAAACCTCTGCATCCAG  | 21     | M 3'           |
| MIR164a//MIR164b          | TGGAGAAGCAGGGACAGTGCA  | 21     | M 5'           |
| MIR165a                   | TCGGACCAGGCTTCATCCCCC  | 22     | M 3' super     |
| MIR165a//MIR165b          | TCGGACCAGGCTTCATCCCCC  | 21     | M 3'           |

|         |                         |    |                |
|---------|-------------------------|----|----------------|
|         | TCGGACCAGGCTTCATCCCC    | 20 | M 3'           |
|         | TCGGACCAGGCTTCATCCC     | 19 | M 3' sub       |
|         | TCGGACCAGGCTTCATCC      | 18 | M 3' sub       |
| MIR166  | GGAATGTTGTCTGGCTCGAGG   | 21 | M 5'           |
|         | TCGGACCAGGCTTCATTCCCC   | 22 | M 5'           |
|         | TTCGGACCAGGCTTCATTCC    | 20 | M 3' sub       |
|         | TTTCGGACCAGGCTTCATTCC   | 21 | M 3' sub       |
|         | GGAATGTTGTCTGGCTCGAGGC  | 22 | M 5' super     |
|         | ATTTTCGGACCAGGCTTCATTCC | 21 | M 3' sub       |
|         | GGAATGTTGTCTGGCTCGAG    | 20 | M 5' sub       |
|         | CGGACCAGGCTTCATTCCCC    | 21 | M 5' sub       |
|         | GGGAATGTTGTCTGGCTCGAGG  | 22 | M 5' super     |
|         | GAATGTTGTCTGGCTCGAGGC   | 21 | M 5' sub/super |
|         | GGGAATGTTGTCTGGCTCGAG   | 21 | M 5' sub/super |
|         | CTCGGACCAGGCTTCATTCCCC  | 22 | M 3' super     |
|         | CTTCGGACCAGGCTTCATTCC   | 21 | M 3' sub/super |
|         | TTCGGACCAGGCTTCATTCCCC  | 22 | M 3' super     |
|         | CCTCGGACCAGGCTTCATTCC   | 21 | M 3' super     |
| MIR166a | CTTCGGACCAGGCTTCATTCC   | 21 | M 3' sub/super |
|         | TTCGGACCAGGCTTCATTCCCC  | 22 | M 3' super     |
| MIR166b | TCTCGGACCAGGCTTCATTCT   | 21 | M 3'           |
|         | TCTCGGACCAGGCTTCATTCT   | 21 | M 3'           |
| MIR166c | GGAATGTTGTCTGGTTCGAGA   | 21 | M 5' sub/super |
|         | GGAATGTTGTCTGGTTCAAGG   | 21 | M 5'           |
|         | GGAATGTTGTCTGGTCCGAGA   | 21 | M 5' super     |
|         | TCGGACCAGGCTTCATTCTC    | 21 | M 3'           |
| MIR166d | TATCGGACCAGGCTTCATTCC   | 21 | M 3' sub/super |
|         | ATCGGACCAGGCTTCATTCC    | 20 | M 3' sub/super |
| MIR166e | TCTCGGACCAGGCTTCATTCCC  | 22 | M 3' super     |
|         | TCTCGAACCAGGCTTCATTCC   | 21 | M 3' sub/super |
|         | CTCGGACCAGGCTTCATTCCC   | 21 | M 3'           |
|         | TCGAACCAGGCTTCATTCCCC   | 21 | M 3'           |
| MIR166f | TCTCGGACCAGGCTTCATTCC   | 21 | M 3'           |
|         | TCTCGGACCAGGCTTCATCCC   | 21 | M 3' sub/super |
|         | TCTCGGACCAGGCTTCATT     | 19 | M 3' sub       |
|         | TCTCGGACCAGGCTTCATCC    | 20 | M 3' sub/super |
|         | CTCTCGGACCAGGCTTCATTCC  | 22 | M 3' sub/super |
|         | TCTCGGACCAGGCTTCATTCT   | 22 | M 3' super     |
| MIR166h | TCTCGGACCAGGCTTCAATCC   | 21 | M 3' sub/super |
| MIR166i | TTGGACCAGGCTTCATTCCCC   | 21 | M 3'           |
|         | TCTCGGATCAGGCTTCATTCC   | 21 | M 3' sub/super |
|         | TTGGACCAGGCTTCATTCC     | 19 | M 3' sub       |
|         | TCGGACCAGGCTTCATTCTC    | 20 | M 3'           |

|                         |                        |    |                |
|-------------------------|------------------------|----|----------------|
| MIR166i/MIR166k         | TCTTGGACCAGGCTTCATTCC  | 21 | M 3'           |
| MIR166m                 | GCGGACCAGGCTTCATTCCCC  | 21 | M 3' super     |
| MIR166p                 | TTCGGACCAGGCTTCATTCCC  | 21 | M 3' super     |
|                         | TCTCGGACCAGGCTCCATTCC  | 21 | M 3' sub/super |
| MIR166u                 | TCTCGGACCAGGCTTCATTCC  | 20 | M 3'           |
| MIR167a                 | TGAAGCTGCCAGCATGATCTA  | 21 | M 5'           |
|                         | TGAAGCTGCCAGCATGATCTGA | 22 | M 5'           |
|                         | TGAAGCTGCCAGCATGATCTC  | 21 | M 5'           |
|                         | AAGCTGCCAGCATGATCTA    | 19 | M 5' sub       |
| MIR167b                 | TGAAGCTGCCAGCATGATCTGG | 22 | M 5'           |
| MIR167b/MIR167f         | AAGCTGCCAGCATGATCTAG   | 20 | M 5' sub/super |
| MIR167c                 | TGAAGCTGCCAGCGTGATCTCA | 22 | M 5'           |
|                         | TGAAGCTGCCAGCATGATCTT  | 21 | M 5'           |
| MIR167f                 | TGAAGCTGCCAGCATGATCTGC | 22 | M 5'           |
| MIR168                  | TCGCTTGGTGCAGGTCGGGA   | 20 | M 5'           |
|                         | CGCTTGGTGCAGGTCGGGAAC  | 21 | M 5' sub       |
|                         | TCGCTTGGTGCAGGTCGGGAAC | 22 | M 5'           |
|                         | TCGCTTGGTGCAGATCGGGAC  | 21 | M 5'           |
| MIR168a/MIR168b         | TCGCTTGGTGCAGGTCGGGAC  | 21 | M 5'           |
|                         | TCGCTTGGTGCAGGTCGGGAA  | 21 | M 5'           |
|                         | CGCTTGGTGCAGGTCGGGAC   | 20 | M 5' sub       |
|                         | TCGCTTGGTGCAGGTCGGGACC | 22 | M 5' super     |
|                         | GCTTGGTGCAGGTCGGGAC    | 19 | M 5' sub       |
|                         | CGCTTGGTGCAGGTCGGGACC  | 21 | M 5' sub/super |
|                         | CTTGGTGCAGGTCGGGAC     | 18 | M 5' sub       |
| MIR168b                 | TCGCTTGGTGCAGGTCGGGTC  | 21 | M 5'           |
| MIR169a                 | CAGCCAAGGATGACTTGCCGG  | 21 | M 5'           |
| MIR169g                 | AAGCCAAGGATGAATTGCCGG  | 21 | M 5'           |
| MIR171f                 | TATTGGCCTGGTTCACTCAGA  | 21 | M 5'           |
| MIR2111                 | TAATCTGCATCCTGAGGTTTG  | 21 | M 5'           |
| MIR319                  | ATTGGACTGAAGGGAGCTCC   | 20 | M 3'           |
| MIR319a/MIR319b/MIR319c | TTGGACTGAAGGGAGCTCC    | 19 | M 3' sub       |
|                         | TTGGACTGAAGGGAGCTC     | 18 | M 3' sub       |
| MIR319a/MIR319c         | TTGGACTGAAGGGAGCTCCC   | 20 | M 3'           |
| MIR319b                 | TTGGACTGAAGGGAGCTCCT   | 20 | M 3'           |
|                         | TGGACTGAAGGGAGCTCCC    | 19 | M 3' sub       |
| MIR319c                 | TTGGACTGAAGGGAGCTCCTT  | 21 | M 3'           |
|                         | TGGACTGAAGGGAGCTCCTT   | 20 | M 3' sub       |
|                         | TTGGACTGAAGGGAGCTCCTC  | 21 | M 3' super     |
|                         | TGGACTGAAGGGAGCTCCT    | 19 | M 3' sub       |
|                         | TGGACTGAAGGGAGCTCCTTT  | 21 | M 3' sub/super |

|                  |                                |    |                |
|------------------|--------------------------------|----|----------------|
|                  | <u>TGGA</u> CTGAAGGGAGCTCCTC   | 20 | M 3' sub/super |
|                  | CTTGGACTGAAGGGAGCTCCTT         | 22 | M 3' super     |
| MIR319q          | TGGACTGAAGGGAGCTCCTTC          | 21 | M 3'           |
| MIR393           | <u>TCCAAAGGGATCGCATTGATCC</u>  | 22 | M 5'           |
|                  | <u>TCCAAAGGGATCGCATTGAT</u>    | 20 | M 5' sub       |
| MIR393a          | <u>TCCAAAGGGATCGCATTGATT</u>   | 21 | M 5' sub       |
| MIR393a//MIR393b | <u>TCCAAAGGGATCGCATTGATC</u>   | 21 | M 5'           |
| MIR393b          | <u>ATCATGCGATCCCTTCGGAAT</u>   | 21 | M 3' sub/super |
| MIR393c//MIR393d | <u>TCCAAAGGGATCGCATTGATCT</u>  | 22 | M 5'           |
| MIR394           | <u>TTGGCATTCTGTCCACCTCC</u>    | 20 | M 5'           |
| MIR395           | <u>ATGAAGTGTTTGGGGGAACTC</u>   | 21 | M 3'           |
|                  | <u>ATGAAGTGTTTGGGGGAACT</u>    | 20 | M 3' sub       |
| MIR395a          | <u>TGAAGTGTTTGGGGGAACTCC</u>   | 21 | M 5' sub       |
| MIR396           | <u>AAGCTCAAGAAAGCTGTGGGA</u>   | 21 | M 3'           |
| MIR396b          | <u>TTCCACAGCTTTCTTGA</u> ACTT  | 21 | M 5'           |
|                  | <u>TTCAAGCTAGCTGTGGGAAG</u>    | 20 | M 3' sub       |
|                  | <u>GTTCAAGCTAGCTGTGGGAAG</u>   | 21 | M 3'           |
|                  | <u>TTCCACAGCTTTCTTGA</u> ACTG  | 21 | M 5'           |
|                  | <u>TTCCACAGCTTTCTTGA</u> ACTTT | 22 | M 5' super     |
| MIR397a          | <u>TCATTGAGTGCAGCGTTGATG</u>   | 21 | M 5'           |
|                  | <u>TCATTGAGTGCAGCGTTGAT</u>    | 20 | M 5'           |
|                  | <u>CATTGAGTGCAGCGTTGATGA</u>   | 21 | M 5' sub/super |
|                  | <u>TCATTGAGTGCAGCGTTGA</u>     | 19 | M 5' sub       |
|                  | <u>TCATTGAGTGCAGCGTTGATGA</u>  | 22 | M 5' super     |
| MIR398a          | <u>TGTGTTCTCAGGTCGCCCC</u> TG  | 21 | M 3'           |
|                  | <u>TGTGTTCTCAGGTCGCCCC</u>     | 18 | M 3' sub       |
|                  | <u>TGTGTTCTCAGGTCGCCCC</u> T   | 20 | M 3' sub       |
| MIR399e          | <u>CGCCAAAGGAGAGTTGCC</u> CTC  | 21 | M 3'           |
| MIR482a          | <u>TCTTGCCAATACCACCCATGCC</u>  | 22 | M 3'           |
|                  | <u>TCTTGCCAATACCACCCATGC</u>   | 21 | M 3' sub       |
| MIR482b          | <u>GGAATGGGCGGTTTGGGAAA</u>    | 20 | M 5' sub/super |
|                  | <u>GGAATGGGCGGTTTGGGAA</u>     | 19 | M 5' sub/super |
|                  | <u>TTTCTATTCTCCCAT</u> TCCAT   | 22 | M 3'           |
|                  | <u>AATGGGCGGTTTGGGAAA</u>      | 18 | M 5' sub       |
|                  | <u>GAATGGGCGGTTTGGGAAA</u>     | 19 | M 5' sub       |
|                  | <u>GAATGGGCGGTTTGGGAA</u>      | 18 | M 5' sub       |
| MIR482c          | <u>TTCCCAAGGCCGCCCAT</u> TCCGA | 22 | M 3'           |
|                  | <u>TTCCCAAGGCCGCCCAT</u> TCC   | 20 | M 3' sub       |
|                  | <u>CCCAAGGCCGCCCAT</u> TCCGAC  | 21 | M 3' sub/super |
|                  | <u>TTCCCAAGGCCGCCCAT</u> TC    | 19 | M 3' sub       |
|                  | <u>TCCCAAGGCCGCCCAT</u> TCCGAC | 22 | M 3' sub/super |

|                 |                              |    |                |
|-----------------|------------------------------|----|----------------|
| MIR5139         | <u>AACCTGGCTCTGATACCA</u>    | 18 | M 5' sub       |
|                 | AAACCTGGCTCTGATACCA          | 19 | M 5'           |
| MIR5139a        | GAAACCTGGCTCTGATACCA         | 20 | M 5'           |
| MIR535a/MIR535b | TGACAACGAGAGAGAGCACGC        | 21 | M 5'           |
| MIR535d         | <u>TGACGACGAGAGAGAGCACGC</u> | 21 | M 5'           |
|                 | TGACGACGAGAGAGAGCACG         | 20 | M 5' sub       |
| MIR6300         | <u>GTCGTTGTAGTATAGTGG</u>    | 18 | M 3'           |
|                 | GTCGTTGTAGTATAGTGGA          | 20 | M 3' super     |
| MIR6478         | <u>CCGACCTTAGCTCAGTTGG</u>   | 19 | M 5' sub       |
|                 | CCGACCTTAGCTCAGTTGGT         | 20 | M 5' sub       |
| MIR8155         | TAACCTGGCTCTGATACCA          | 19 | M 3'           |
| MIR858a         | <u>TTCGTTGTCTGTTGACCT</u>    | 18 | M 5' sub       |
|                 | TTCGTTGTCTGTTGACCT           | 19 | M 5' sub       |
|                 | TTCGTTGTCTGTTGACCTTG         | 21 | M 5' sub/super |

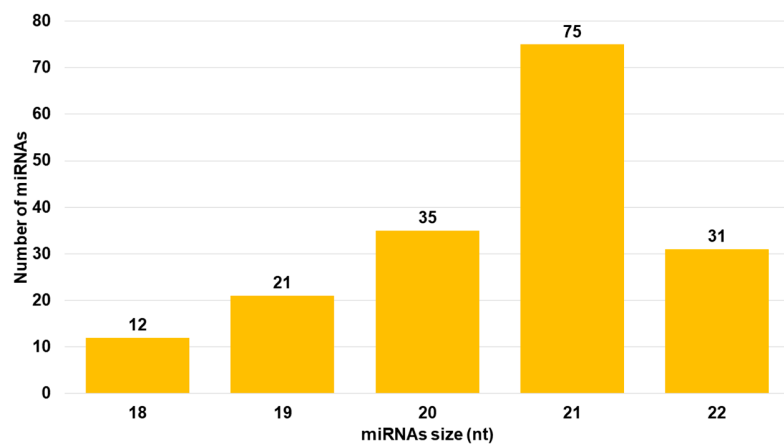

**Supplementary Figure S1.** Frequency distribution of sizes of miRNAs found in guava fruit.
